# Supplementary material for: Dynamic Functional Network Connectivity Changes Associated with fMRI Neurofeedback of Right Premotor Cortex
Source: MDPI journal article supplement (doi:10.3390/brainsci11050582), 2021-04-30
Supplement: s1 [file s1]

## Supplementary Materials

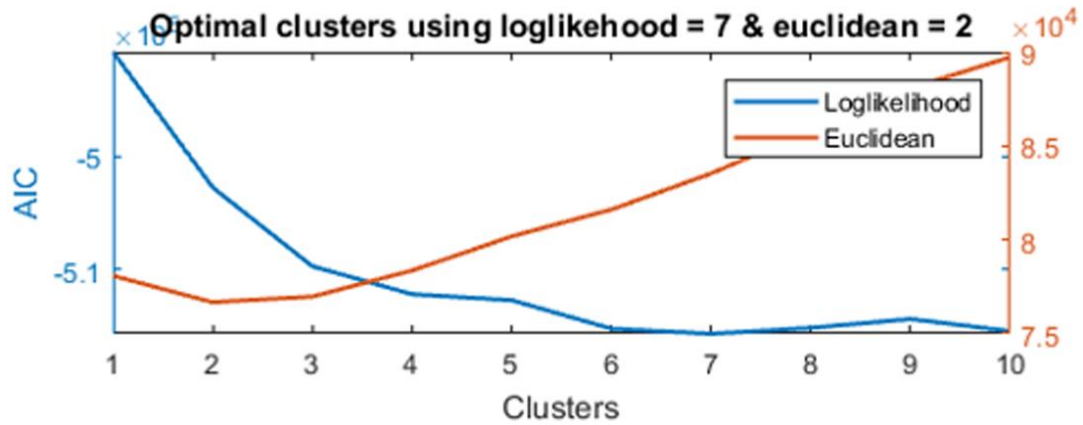

Figure 1. Estimation of optimal clusters by AIC.

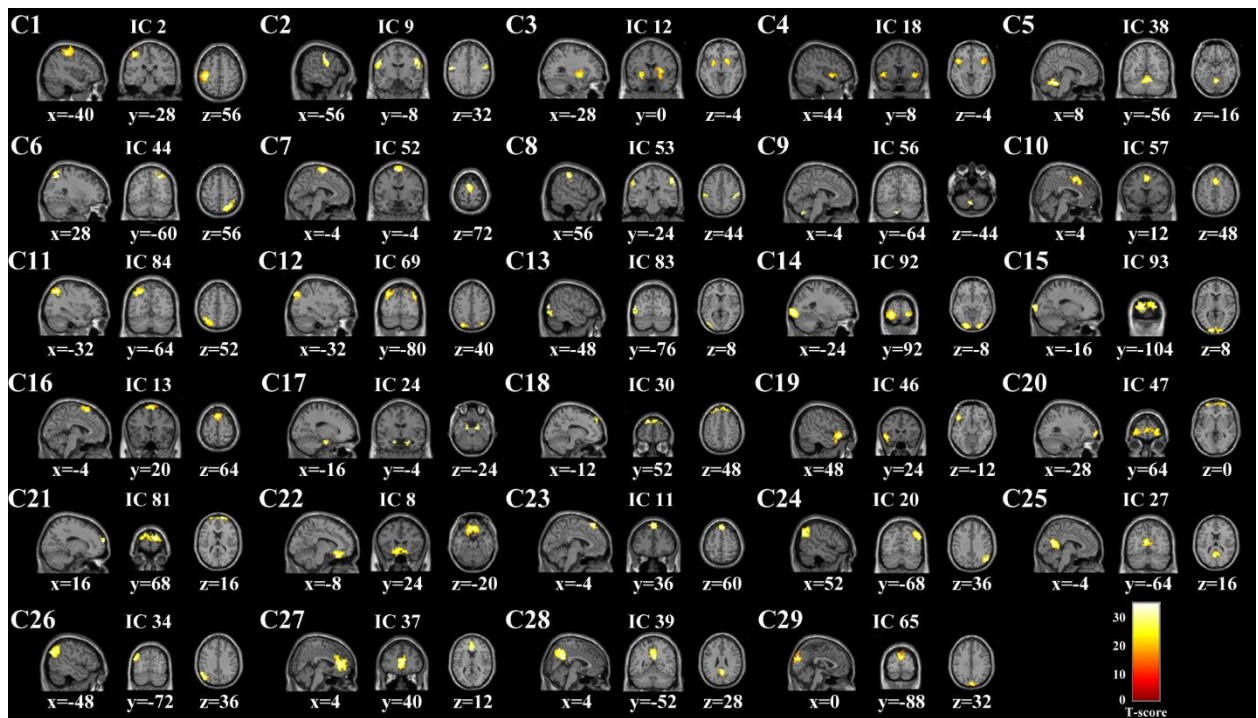

Figure 2. The spatial activation maps of the 29 task-related components that belonged to MN, VN, CCN and DMN.
